# Supplementary material for: Antisense PMO Found in Dystrophic Dog Model Was Effective in Cells from Exon 7-Deleted DMD Patient
Source: PubMed Central journal article supplement (PMC2923599; doi:10.1371/journal.pone.0012239), 2010-08-18
Supplement: pone.0012239.s002.pdf [file pone.0012239.s002.pdf]

## Supporting information

**Supplemental Table S1.** Sequences of antisense PMO for dystrophin gene (for dog and human if not specified).

|                   |                            |
|-------------------|----------------------------|
| Ex6A              | GTTGATTGTCGGACCCAGCTCAGG   |
| Ex6B (for dog)    | ACCTATGACTGTGGATGAGAGCGTT  |
| Ex8A              | CTTCCTGGATGGCTTCAATGCTCAC  |
| Ex8G              | GGCAAACTTGAAGAGTGATGTGA    |
| Ex8I              | CCTTGGCAACATTTCCAATTCCCTGG |
| Ex8K              | TTTACCTGTTGAGAATAGTGCATTT  |
| hEx6B (for human) | ACCTATGACTATGGATGAGAGCATT  |
