# Supplementary material for: Antisense PMO Found in Dystrophic Dog Model Was Effective in Cells from Exon 7-Deleted DMD Patient
Source: PubMed Central journal article supplement (PMC2923599; doi:10.1371/journal.pone.0012239), 2010-08-18
Supplement: pone.0012239.s003.pdf [file pone.0012239.s003.pdf]

## Supporting information

### Supplemental Table S2. Sequences of qRT-PCR primers.

#### Primers for dog dystrophin qRT-PCR

|                       |                      |
|-----------------------|----------------------|
| <i>dDMD2/3jnc</i> Fwd | AAGTTTGGGAAGCAGCACAT |
| <i>dDMD4</i> Rev      | GGGCATGAACTCTTGTGGAT |
| <i>dGAPDH</i> Fwd     | GAGTCCACTGGGGTCTTCA  |
| <i>dGAPDH</i> Rev     | GAGGAGCCAAGCAGTTGGT  |

#### Primers for human dystrophin qRT-PCR

|                   |                      |
|-------------------|----------------------|
| <i>hDMD3</i> Fwd  | TGGGAAGCAGCATATTGAGA |
| <i>hDMD4</i> Rev  | GGGCATGAACTCTTGTGGAT |
| <i>hGAPDH</i> Fwd | GAGTCCACTGGCGTCTTCA  |
| <i>hGAPDH</i> Rev | GGGGTGCTAAGCAGTTGGT  |
