# Supplementary material for: Antisense PMO Found in Dystrophic Dog Model Was Effective in Cells from Exon 7-Deleted DMD Patient
Source: PubMed Central journal article supplement (PMC2923599; doi:10.1371/journal.pone.0012239), 2010-08-18
Supplement: pone.0012239.s004.pdf [file pone.0012239.s004.pdf]

## Supporting information

### Supplemental Table S3. Sequences of RT-PCR primers.

#### Primers for dog dystrophin exons 5-10 RT-PCR

|                   |                        |
|-------------------|------------------------|
| <i>dhDMD5</i> Fwd | CTGACTCTTGGTTTGATTTGGA |
| <i>dDMD10</i> Rev | TGCTTCGGTCTCTGTCAATG   |

#### Primers for human dystrophin RT-PCR

##### Amplification of exons 5-10

|                   |                        |
|-------------------|------------------------|
| <i>dhDMD5</i> Fwd | CTGACTCTTGGTTTGATTTGGA |
| <i>hDMD10</i> Rev | CTCTCCATCAATGAACTGCC   |

##### Pre-amplification of exons 4-11 for nested RT-PCR

|                   |                      |
|-------------------|----------------------|
| <i>hDMD4</i> Fwd  | ATCCACAAGAGTTCATGCCC |
| <i>hDMD11</i> Rev | ATGCTAGCTACCCTGAGGCA |
